# Supplementary material for: Effect of socio-demographic factors on the association between multimorbidity and healthcare costs: a population-based, retrospective cohort study
Source: PubMed Central journal article supplement — BMJ Open. 2017 Oct 6;7(10):e017264. doi: 10.1136/bmjopen-2017-017264 (PMC5640069; doi:10.1136/bmjopen-2017-017264), 2017-10-06
Supplement: bmjopen-2017-017264supp001.pdf [file bmjopen-2017-017264supp001.pdf]

**Appendix 1.** List of diagnosis codes used to define the 16 selected medical conditions

| <b>Condition</b>                                                                                                                                                                                                                                                           | <b>ICD 9 / OHIP<br/>fee codes</b>                                                                                                   | <b>ICD 10</b>                                                                                                                                                                                        |
|----------------------------------------------------------------------------------------------------------------------------------------------------------------------------------------------------------------------------------------------------------------------------|-------------------------------------------------------------------------------------------------------------------------------------|------------------------------------------------------------------------------------------------------------------------------------------------------------------------------------------------------|
| AMI*                                                                                                                                                                                                                                                                       | 410                                                                                                                                 | I21, I22                                                                                                                                                                                             |
| Arthritis - Osteoarthritis<br>Arthritis - Other Arthritis<br>(Synovitis, Fibrositis,<br>Connective tissue disorders,<br>Ankylosing spondylitis, Gout<br>Traumatic arthritis, pyogenic<br>arthritis, Joint derangement,<br>Dupuytren’s contracture, Other<br>MSK disorders) | 715<br><br>727, 729, 710, 720,<br>274, 716, 711, 718,<br>728, 739                                                                   | M15-M19<br><br>M00-M03, M07, M10,<br>M11-M14, M20-M25,<br>M30-M36, M65-M79                                                                                                                           |
| Arthritis - Rheumatoid arthritis                                                                                                                                                                                                                                           | 714                                                                                                                                 | M05-M06                                                                                                                                                                                              |
| Asthma*                                                                                                                                                                                                                                                                    | 493                                                                                                                                 | J45                                                                                                                                                                                                  |
| Cancer                                                                                                                                                                                                                                                                     | 140-239                                                                                                                             | C00-C26, C30-C44, C45-<br>C97,                                                                                                                                                                       |
| Cardiac Arrhythmia                                                                                                                                                                                                                                                         | 427.3 (DAD) / 427<br>(OHIP)                                                                                                         | I48.0, I48.1                                                                                                                                                                                         |
| CHF*                                                                                                                                                                                                                                                                       | 428                                                                                                                                 | I500, I501, I509                                                                                                                                                                                     |
| COPD*                                                                                                                                                                                                                                                                      | 491, 492, 496                                                                                                                       | J41, J43, J44                                                                                                                                                                                        |
| Dementia                                                                                                                                                                                                                                                                   | 290, 331, 797 (OHIP)<br>/ 290.0, 290.1, 290.3,<br>290.4, 290.8, 290.9,<br>294.1, 294.8, 294.9,<br>331.0, 331.1, 331.2,<br>797 (DAD) | F000, F001, F002, F009,<br>F010, F011, F012, F013,<br>F018, F019, F020, F021,<br>F022, F023, F024, F028,<br>F03, F051, F065, F066,<br>F068, F069, F09, G300,<br>G301, G308, G309, G310,<br>G311, R54 |
| Depression                                                                                                                                                                                                                                                                 | 311, 300, 296                                                                                                                       | F32, F33, F412, F480                                                                                                                                                                                 |
| Diabetes*                                                                                                                                                                                                                                                                  | 250                                                                                                                                 | E08 - E13                                                                                                                                                                                            |
| Hypertension*                                                                                                                                                                                                                                                              | 401, 402, 403, 404,<br>405                                                                                                          | I10, I11, I12, I13, I15                                                                                                                                                                              |
| Osteoporosis                                                                                                                                                                                                                                                               | 733                                                                                                                                 | M81 M82                                                                                                                                                                                              |
| Renal failure                                                                                                                                                                                                                                                              | 403, 404, 584, 585,<br>586, v451                                                                                                    | N17, N18, N19, T82.4,<br>Z49.2, Z99.2                                                                                                                                                                |
| Stroke                                                                                                                                                                                                                                                                     | 430, 431, 432, 434,<br>436                                                                                                          | I60-I64                                                                                                                                                                                              |
| Coronary syndrome<br>(excluding MI)                                                                                                                                                                                                                                        | 411-414                                                                                                                             | I20, I22-I25                                                                                                                                                                                         |

**Note:** \* validated diagnosis codes; OHIP, Ontario Health Insurance Plan; AMI, Acute Myocardial Infarction, MSK, musculoskeletal; DAD, Discharge Abstract Database; CHF, Congestive Heart Failure; COPD, Chronic Obstructive Pulmonary Disease; MI, Myocardial infarction

**Appendix 2.** Proportions and mean number of medical conditions by baseline characteristics,

April 1, 2009 to March 31, 2010

|                             | N         | Number of medical conditions |       |       |       |        | Mean (SD)   |
|-----------------------------|-----------|------------------------------|-------|-------|-------|--------|-------------|
|                             |           | 1 (%)                        | 2 (%) | 3 (%) | 4 (%) | ≥5 (%) |             |
| <b>All cohort</b>           | 6,639,089 | 52.2                         | 24.2  | 12.3  | 6.1   | 5.2    | 1.88 (1.16) |
| <b>Sex</b>                  |           |                              |       |       |       |        |             |
| Female                      | 3,541,644 | 49.2                         | 25.3  | 13.4  | 6.6   | 5.5    | 1.94 (1.18) |
| Male                        | 3,097,445 | 55.6                         | 22.8  | 11.1  | 5.5   | 5.0    | 1.81 (1.14) |
| <b>Age (years)</b>          |           |                              |       |       |       |        |             |
| 0-19                        | 809,782   | 89.8                         | 9.3   | 0.8   | 0.1   | 0.01   | 1.11 (0.35) |
| 20-34                       | 908,634   | 77.2                         | 18.8  | 3.4   | 0.5   | 0.1    | 1.27 (0.55) |
| 35-44                       | 875,680   | 66.5                         | 24.4  | 7.0   | 1.7   | 0.5    | 1.45 (0.74) |
| 45-64                       | 2,410,603 | 47.0                         | 29.9  | 14.4  | 5.7   | 3.0    | 1.88 (1.05) |
| 65-74                       | 836,640   | 25.3                         | 29.3  | 22.3  | 12.7  | 10.4   | 2.53 (1.28) |
| 70-74                       | 383,237   | 21.8                         | 28.2  | 23.2  | 14.2  | 12.6   | 2.68 (1.30) |
| 75+                         | 797,750   | 13.6                         | 22.4  | 23.2  | 17.8  | 23.0   | 3.14 (1.36) |
| <b>Income quintile</b>      |           |                              |       |       |       |        |             |
| Lowest                      | 1,249,664 | 50.3                         | 23.8  | 12.8  | 6.8   | 6.3    | 1.95 (1.21) |
| Middle-low                  | 1,307,725 | 50.8                         | 24.3  | 12.8  | 6.5   | 5.7    | 1.92 (1.18) |
| Middle                      | 1,317,644 | 52.4                         | 24.2  | 12.2  | 6.1   | 5.1    | 1.87 (1.15) |
| Middle-high                 | 1,365,082 | 53.2                         | 24.3  | 12.0  | 5.8   | 4.8    | 1.85 (1.13) |
| Highest                     | 1,340,912 | 53.5                         | 24.5  | 11.9  | 5.7   | 4.5    | 1.83 (1.12) |
| <b>Rurality index</b>       |           |                              |       |       |       |        |             |
| Non-rural (< 40)            | 6,038,705 | 52.3                         | 24.1  | 12.3  | 6.1   | 5.2    | 1.88 (1.56) |
| Rural (≥40)                 | 514,225   | 48.9                         | 25.0  | 13.3  | 6.8   | 5.9    | 1.96 (1.19) |
| <b>Deprivation quintile</b> |           |                              |       |       |       |        |             |
| Least deprived              | 1,654,445 | 55.0                         | 24.0  | 11.4  | 5.3   | 4.3    | 1.80 (1.11) |
| Less deprived               | 1,504,855 | 52.6                         | 24.4  | 12.2  | 5.9   | 4.9    | 1.86 (1.14) |
| Somewhat deprived           | 1,328,459 | 51.1                         | 24.4  | 12.7  | 6.4   | 5.5    | 1.91 (1.17) |
| Very deprived               | 1,101,586 | 50.0                         | 24.3  | 13.0  | 6.7   | 6.0    | 1.94 (1.20) |
| Most deprived               | 934,094   | 50.0                         | 23.8  | 12.9  | 6.8   | 6.4    | 1.96 (1.21) |

**Appendix 2. (Cont'd)**

|                                                                              | N         | Number of medical conditions |       |       |       |        | Mean (SD)   |
|------------------------------------------------------------------------------|-----------|------------------------------|-------|-------|-------|--------|-------------|
|                                                                              |           | 1 (%)                        | 2 (%) | 3 (%) | 4 (%) | ≥5 (%) |             |
| <b>Instability quintile</b>                                                  |           |                              |       |       |       |        |             |
| Least unstable                                                               | 1,715,922 | 56.6                         | 24.0  | 11.0  | 4.9   | 3.5    | 1.75 (1.06) |
| Less unstable                                                                | 1,365,580 | 53.2                         | 24.4  | 12.1  | 5.8   | 4.6    | 1.84 (1.13) |
| Somewhat unstable                                                            | 1,077,375 | 50.5                         | 24.6  | 12.9  | 6.5   | 5.5    | 1.91 (1.17) |
| Very unstable                                                                | 1,195,108 | 50.4                         | 24.2  | 12.8  | 6.6   | 6.0    | 1.94 (1.20) |
| Most unstable                                                                | 1,169,454 | 47.3                         | 23.9  | 13.6  | 7.6   | 7.6    | 2.04 (1.26) |
| <b>Dependency quintile</b>                                                   |           |                              |       |       |       |        |             |
| Least dependent                                                              | 1,400,521 | 59.3                         | 23.3  | 10.0  | 4.3   | 3.1    | 1.69 (1.02) |
| Less dependent                                                               | 1,456,755 | 55.5                         | 24.1  | 11.3  | 5.2   | 4.0    | 1.78 (1.09) |
| Somewhat dependent                                                           | 1,280,391 | 52.4                         | 24.5  | 12.3  | 5.9   | 4.9    | 1.86 (1.14) |
| Very dependent                                                               | 1,134,858 | 49.3                         | 24.7  | 13.3  | 6.8   | 5.9    | 1.95 (1.19) |
| Most dependent                                                               | 1,250,914 | 42.2                         | 24.6  | 15.3  | 8.9   | 9.0    | 2.18 (1.31) |
| <b>Ethnic concentration quintile</b>                                         |           |                              |       |       |       |        |             |
| Lowest                                                                       | 848,456   | 47.2                         | 25.1  | 13.9  | 7.3   | 6.5    | 2.01 (1.22) |
| Middle-low                                                                   | 1,060,646 | 49.8                         | 24.8  | 13.0  | 6.6   | 5.7    | 1.91 (1.19) |
| Middle                                                                       | 1,160,097 | 51.0                         | 24.5  | 12.6  | 6.3   | 5.5    | 1.91 (1.17) |
| Middle-high                                                                  | 1,323,040 | 53.4                         | 24.0  | 11.8  | 5.8   | 5.0    | 1.84 (1.14) |
| Highest                                                                      | 2,131,200 | 54.9                         | 23.5  | 11.5  | 5.5   | 4.6    | 1.81 (1.12) |
| <b>Primary care model</b>                                                    |           |                              |       |       |       |        |             |
| Family health teams/<br>other primary<br>care models                         | 1,109,443 | 51.0                         | 24.9  | 12.6  | 6.3   | 5.2    | 1.94 (1.28) |
| Family health networks<br>/family health<br>organizations                    | 1,054,714 | 49.6                         | 25.3  | 13.1  | 6.5   | 5.5    | 1.97 (1.30) |
| Community health<br>centres/family health<br>groups/non-rostered<br>patients | 4,474,932 | 53.1                         | 23.7  | 12.0  | 6.0   | 5.2    | 1.90 (1.29) |
